# Supplementary material for: Use of an Automated Bilingual Digital Health Tool to Reduce Unhealthy Alcohol Use Among Latino Emergency Department Patients: A Randomized Clinical Trial
Source: PubMed Central journal article supplement (PMC10208138; doi:10.1001/jamanetworkopen.2023.14848), 2023-05-23
Supplement: jamanetwopen-e2314848-s002.pdf [file jamanetwopen-e2314848-s002.pdf]

## Supplementary Online Content

Vaca FE, Dziura J, Abujarad F, et al. Use of an automated bilingual digital health tool to reduce unhealthy alcohol use among Latino emergency department patients: a randomized clinical trial. *JAMA Netw Open*. 2023;6(5):e2314848. doi:10.1001/jamanetworkopen.2023.14848

**eFigure.** Example Screenshots of AB-CASI: English and Spanish Versions

This supplemental material has been provided by the authors to give readers additional information about their work.

**eFigure.** Example Screenshots of AB-CASI: English and Spanish Versions

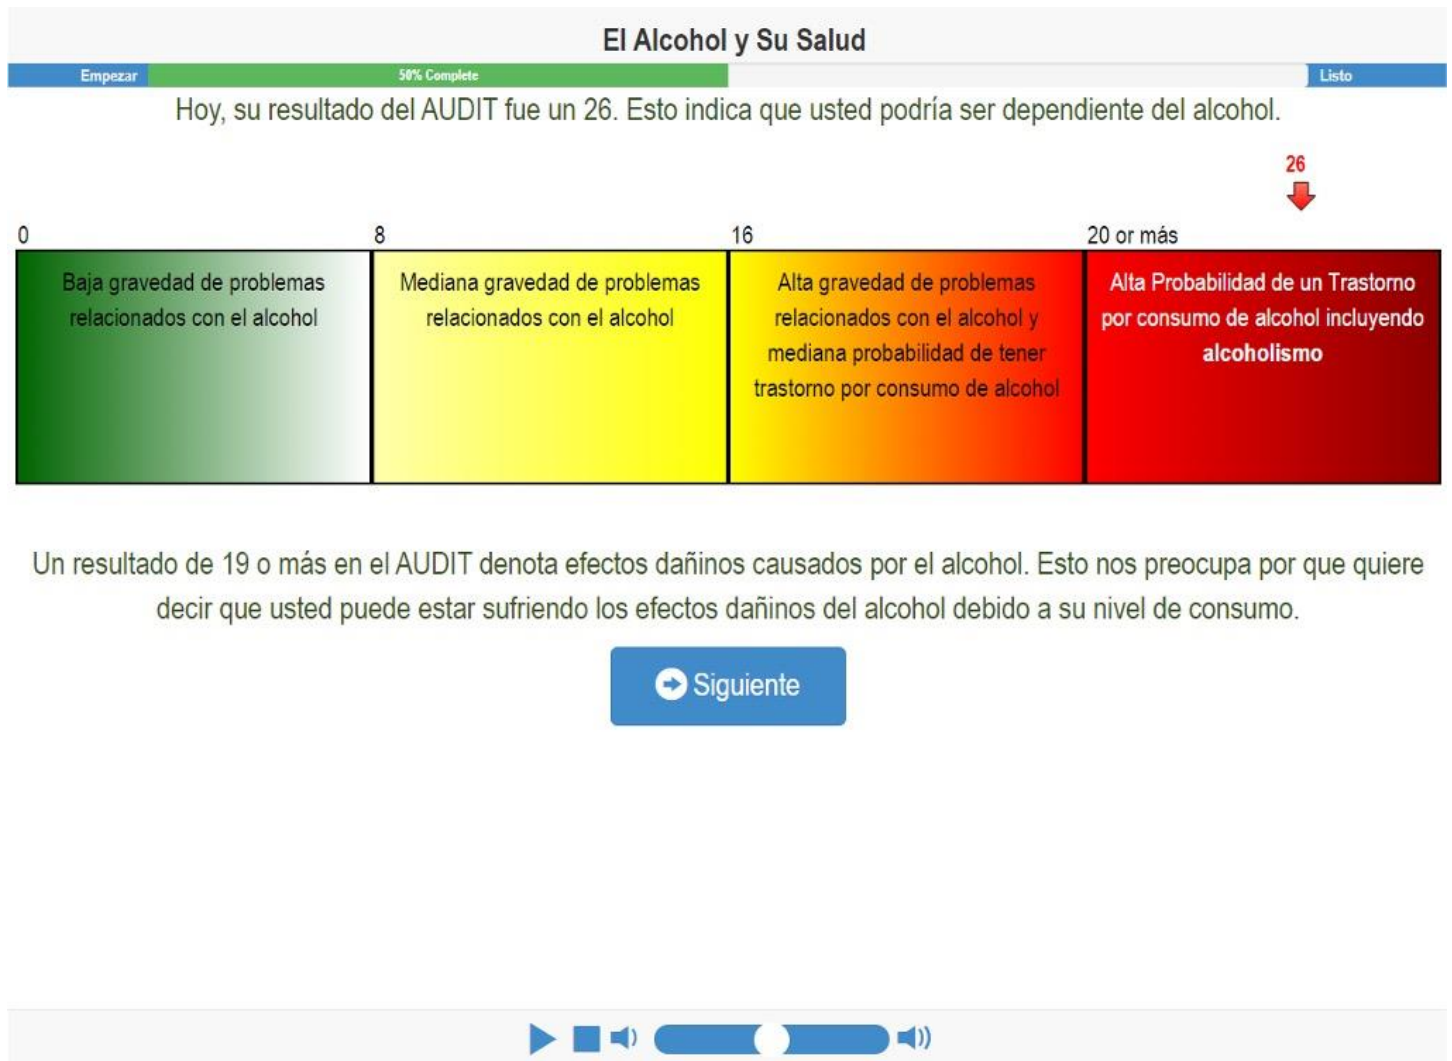

**Panel 1.** Spanish - AUDIT score presented with reference to severity levels of potential alcohol health effects

## Alcohol and Your Health

Start

76% Complete

Finish

Select all that apply: I'm ready to accept a treatment referral because:

- I want to avoid coming back to the Emergency Room
- I want to be healthy
- I want to avoid health problems
- I want to avoid situations where I could get hurt
- I want to be in better control of my behavior
- I want to save money
- I want to avoid school or work problems
- I feel bad about my drinking
- My partner or spouse wants me to get treatment
- I want to avoid becoming an alcoholic like someone I know
- I want to avoid getting arrested for driving after drinking
- Some other reason

Next

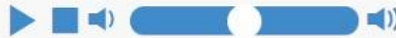

**Panel 2.** English - Listed reasons for a participant of higher alcohol use disorder severity to choose a reason(s) they are ready to accept a specialized treatment referral today

## Alcohol and Your Health

Start

65% Complete

Finish

Thinking about the information you have just heard and considering your answers, we want to ask you about how you feel about cutting down.

On a scale of 1-10 where 1 means “not at all ready” and 10 means “extremely ready”, how ready are you to cut down on the amount of alcohol you drink?

NOT READY

VERY READY

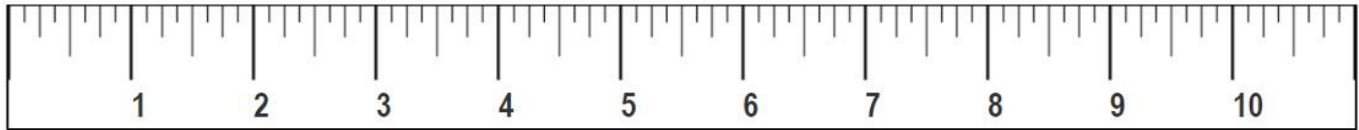

Next

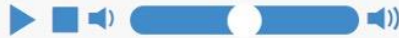

**Panel 3.** English - Readiness to change ruler

## El Alcohol y Su Salud

Empezar

83% Complete

Listo

Le sugeriremos que tome un minuto para considerar sus respuestas y toda la información que le hemos proveído. Cual de la siguientes acciones está usted dispuesto a tomar para reducir su consumo de alcohol.

- **NO ESTOY PREPARADO** para reducir su consumo de alcohol en este momento
- **NO PUEDO PROMETER** que reduzca mi consumo a el límite recomendado pero si puedo reducirlo por lo menos un poco. Así haría progreso.
- **YO PROMETO** no tomar más de 4 bebidas al día ni mas de 14 bebidas a la semana. Su promesa a beber dentro del limite recomendado es una buena decisión para su salud.
- **YO PROMETO** dejar de beber alcohol por completo. Su promesa de no beber es una buena decisión para su salud. Para algunas personas esta es la mejor manera de reducir la probabilidad de heridas o enfermedades relacionadas al alcohol.

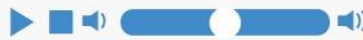

**Panel 4.** Spanish - Four actions for a participant of lower alcohol use disorder severity to choose from as their own next step as they consider their health and alcohol use
