# Supplementary material for: Use of an Automated Bilingual Digital Health Tool to Reduce Unhealthy Alcohol Use Among Latino Emergency Department Patients: A Randomized Clinical Trial
Source: PubMed Central journal article supplement (PMC10208138; doi:10.1001/jamanetworkopen.2023.14848), 2023-05-23
Supplement: jamanetwopen-e2314848-s003.pdf [file jamanetwopen-e2314848-s003.pdf]

## Data Sharing Statement

Vaca. Use of an Automated Bilingual Digital Health Tool to Reduce Unhealthy Alcohol Use Among Latino Emergency Department Patients. *JAMA Netw Open*. Published May 23, 2023. doi:10.1001/jamanetworkopen.2023.14848

### Data

**Data available:** Yes

**Data types:** Other (please specify)

**Additional Information:** Data used specifically in this manuscript could be made available to research scientists upon review of request and in accordance with privacy policies

**How to access data:** Initially contact corresponding author

**When available:** With publication

### Supporting Documents

**Document types:** None

### Additional Information

**Who can access the data:** Research scientists whose proposed use of the data has been approved in accordance with all policies

**Types of analyses:** Secondary analysis of data used specifically in this manuscript

**Mechanisms of data availability:** After approval of an IRB proposal and with a signed and executed data use agreement
